# Supplementary material for: Research on the photoluminescence properties of Cu2+-doped perovskite CsPbCl3 quantum dots
Source: Royal Society of Chemistry journal article supplement (doi:10.1039/d0ra09043c), 2021-01-01
Supplement: d0ra09043c1.pdf [file d0ra09043c1.pdf]

## Supplementary Information

### Research of the photoluminescence properties of Cu<sup>2+</sup>-doped perovskite CsPbCl<sub>3</sub> quantum dots

Ronghua Wu<sup>a</sup>, Zhongchen Bai<sup>a,b</sup>, Jinguo Jiang<sup>a</sup>, Heng Yao<sup>a</sup>, Shuijie Qin<sup>a\*</sup>

<sup>a</sup> Guizhou Province Key Lab. for Photoelectric Technology and Application, Guizhou University, Guiyang City, 550025, People's Republic of China

<sup>b</sup> College of Medicine, Guizhou University, Guiyang City, 550025, People's Republic of China

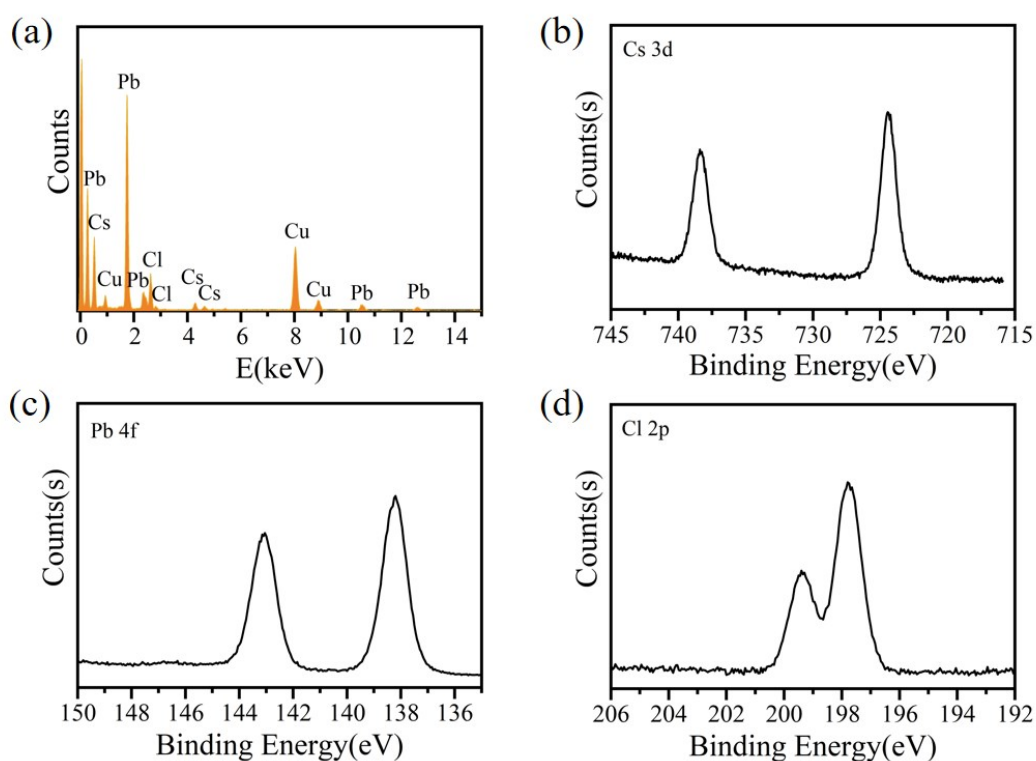

Figure S1. Cu<sup>2+</sup>-doped CsPbCl<sub>3</sub> QDs with the Cu-to-Pb molar ratio of 0.9:1. (a) EDX spectrum. (b-d) The high-resolution XPS spectra corresponding to Cs 3d, Pb 4f, Cl 2p, respectively.

Table S1. The doping concentrations of Cu ions relative to Pb ions in Cu: CsPbCl<sub>3</sub> QDs with different molar ratios of Cu/Pb (0.1/1, 0.3/1, 0.5/1, 0.9/1, 1.7/1) measured by ICP-OES.

| <b>Cu: Pb molar ratios</b> | <b>Cu concentrations(%)</b> |
|----------------------------|-----------------------------|
| <b>0.1:1</b>               | <b>0.58</b>                 |
| <b>0.3:1</b>               | <b>1.26</b>                 |
| <b>0.5:1</b>               | <b>1.56</b>                 |
| <b>0.9:1</b>               | <b>2.32</b>                 |
| <b>1.7:1</b>               | <b>3.64</b>                 |
